# Supplementary material for: Efficiency of ER:YAG laser therapy in combination with behaviour management technique in reducing anxiety among paediatric dental patients – a study protocol for a randomised clinical trial
Source: HighWire-hosted journal article supplement (doi:10.1136/bmjopen-2021-054523), 2022-09-01
Supplement: bmjopen-2021-054523supp001_data_supplement.pdf [file bmjopen-2021-054523supp001_data_supplement.pdf]

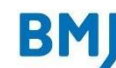

## Consent form

For a patient's consent to publication of images and/or information about them in BMJ publications.

Name of patient: \_\_\_\_\_

Patient's parent/guardian: \_\_\_\_\_

Material – text (information about your child's oral health, level of dental anxiety and dynamics of heart rate): \_\_\_\_\_

Provisional title of article in which Material will be included: Efficacy of Combined Er:YAG Laser Therapy and Behaviour Management Technique in Reducing Anxiety among Paediatric Dental Patients

---

### CONSENT

I \_\_\_\_\_ [ENTER YOUR FULL NAME] give my consent for the Material about my child to appear in a BMJ publication.

**I confirm that I:** (please tick boxes to confirm)

- have seen the text or other material about my child**
- have read the article to be submitted to BMJ**
- am legally entitled to give this consent.**

I understand the following:

- (1) The Material will be published without my child's name attached, however I understand that complete anonymity cannot be guaranteed. It is possible that somebody somewhere may recognise my child.
- (2) The Material may show or include details of my child's medical condition or injury and any prognosis, treatment or surgery that I have/the patient has, had or may have in the future.
- (3) The article may be published in a journal which is distributed worldwide. BMJ's publications go mainly to doctors and other healthcare professionals but are also seen by many others including academics, students and journalists.
- (4) The article, including the Material, may be the subject of a press release, and may be linked to from social media and/or used in other promotional activities. Once published, the article will be placed on a BMJ website and may also be available on other websites.
- (5) The text of the article will be edited for style, grammar and consistency before publication.
- (6) I and my child will not receive any financial benefit from publication of the article.

Patient consent form 050419



- (7) The article may also be used in full or in part in other publications and products published by BMJ and/or by other publishers. This includes publication in English and in translation, in print, in digital formats, and in any other formats that may be used by BMJ or other publishers now and in the future. The article may appear in local editions of journals or other publications, published in the UK and overseas.
- (8) I can revoke my consent at any time before publication, but once the article has been committed to publication ("gone to press") it will not be possible to revoke the consent.
- (9) This consent form will be retained securely and in confidence by BMJ in accordance with the law, for no longer than necessary. Personal data provided in this form will be used and retained in accordance with BMJ's Privacy Policy available at <https://www.bmj.com/company/your-privacy/>.

*Signed:* \_\_\_\_\_ *Print name:* \_\_\_\_\_

*Address:* \_\_\_\_\_ *Email address:* \_\_\_\_\_

\_\_\_\_\_ *Telephone no:* \_\_\_\_\_

*\* signing on behalf of the patient who is under the age of 18*

\_\_\_\_\_ *Date:* \_\_\_\_\_

---

**Corresponding author**

*Signed:* \_\_\_\_\_

*Author's name:* Maria Shindova

*Position:* Senior Assistant Professor

*Address:* 3 Hristo Botev Bulv., Plovdiv, Bulgaria

*Institution:* Department of Pediatric

*Dentistry, Faculty of Dental Medicine,*

*Medical University of Plovdiv*

*Email address:*

*mariya.shindova@gmail.com*

*Telephone no:* + 359 898 390 935

*Date:* \_\_\_\_\_
