# Supplementary material for: Efficiency of ER:YAG laser therapy in combination with behaviour management technique in reducing anxiety among paediatric dental patients – a study protocol for a randomised clinical trial
Source: HighWire-hosted journal article supplement (doi:10.1136/bmjopen-2021-054523), 2022-09-01
Supplement: bmjopen-2021-054523supp002_data_supplement.pdf [file bmjopen-2021-054523supp002_data_supplement.pdf]

## INFORMATION LEAFLET

**DEPARTMENT OF PAEDIATRIC DENTISTRY  
LASER CENTER  
FACULTY OF DENTAL MEDICINE,  
MEDICAL UNIVERSITY OF PLOVDIV, BULGARIA**

### **EFFICIENCY OF ER:YAG LASER THERAPY IN COMBINATION WITH BEHAVIOUR MANAGEMENT TECHNIQUE IN REDUCING ANXIETY AMONG PAEDIATRIC DENTAL PATIENTS**

**DESCRIPTION:** You and your child are invited to participate in a research study on the efficiency of Er:YAG laser therapy in combination with behavior management technique in reducing anxiety among pediatric dental patients.

**PROCEDURES:** With your permission, we would like to collect information about your children's dental anxiety before, during and after dental treatment of a caries lesion. This study does not involve any experiments, just preventive procedures and dental treatment, collection, and study of the required information.

**RISKS AND BENEFITS:** There are no anticipated risks associated with this study. You will not receive any direct benefit from participation.

**TIME INVOLVEMENT:** Your child's participation in this study will not require more time from you other than for the first visit including an explanation of the study, oral examination and a preventive procedure (sealant application). The second appointment at 7-day recall will include dental treatment.

**PAYMENTS:** You will not be paid to participate in this study. You will not pay for the treatment of your child in this study.

**PARTICIPANT'S RIGHTS:** If you have read this form and have decided your child to participate in this research, please understand your participation is voluntary and you have the right to withdraw your consent or discontinue participation at any time without penalty or loss of benefits to which you are otherwise entitled.

The results of this research study may be presented at scientific or professional meetings or published in scientific journals. However, your identity will not be disclosed.

Thank you for your time and attention!

Name of parent/guardian .....

Signature of parent /guardian .....

Name of patient .....

Telephone number .....

Name of the dentist .....

Signature of the dentist .....

For additional information regarding the trial, you can contact us at the given address, emails, or phone numbers.

**Researchers:**

Maria Shindova, DDS, MSc, PhD  
Chief Assistant Professor  
Department of Pediatric Dentistry  
Faculty of Dental Medicine  
Medical University – Plovdiv  
3 Hristo Botev Blvd  
4000 Plovdiv, Bulgaria  
Mobile: + 359 898 390 935  
mariya.shindova@gmail.com  
Mariya.Shindova@mu-plovdiv.bg

Ani Belcheva, DDS, MSc, PhD  
Professor  
Department of Pediatric Dentistry  
Faculty of Dental Medicine  
Medical University - Plovdiv  
3 Hristo Botev Blvd  
4000 Plovdiv, Bulgaria  
Mobile: + 359 889 528 932  
abeltcheva@yahoo.com
