# Supplementary material for: Efficiency of ER:YAG laser therapy in combination with behaviour management technique in reducing anxiety among paediatric dental patients – a study protocol for a randomised clinical trial
Source: HighWire-hosted journal article supplement (doi:10.1136/bmjopen-2021-054523), 2022-09-01

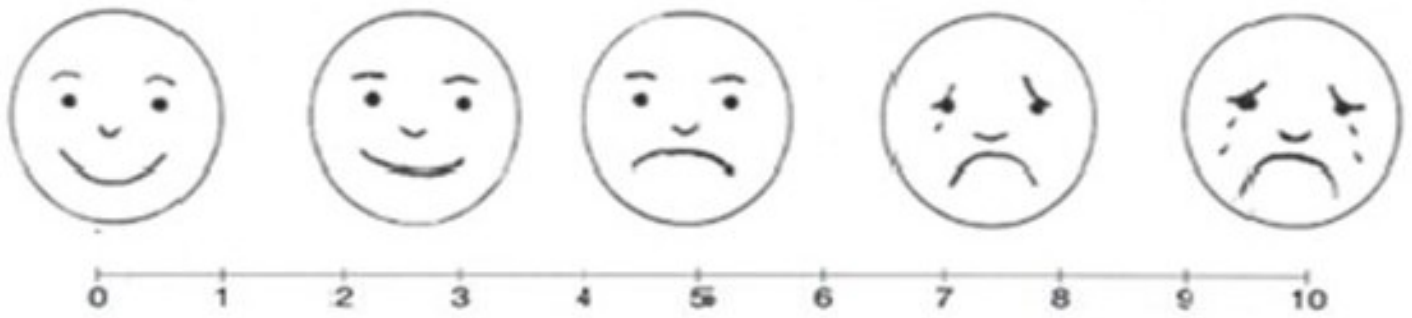

Supplement: bmjopen-2021-054523supp003_data_supplement.pdf [file bmjopen-2021-054523supp003_data_supplement.pdf]
